# Supplementary material for: Atmospheric new particle formation characteristics in the Arctic as measured at Mount Zeppelin, Svalbard, from 2016 to 2018
Source: Copernicus journal article supplement (doi:10.5194/acp-20-13425-2020), 2020-11-12
Supplement: Supplementary file 1 [file acp-20-13425-2020-supplement.pdf]

Supplement of Atmos. Chem. Phys., 20, 13425–13441, 2020  
<https://doi.org/10.5194/acp-20-13425-2020-supplement>  
© Author(s) 2020. This work is distributed under  
the Creative Commons Attribution 4.0 License.

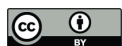

*Supplement of*

## **Atmospheric new particle formation characteristics in the Arctic as measured at Mount Zeppelin, Svalbard, from 2016 to 2018**

**Haebum Lee et al.**

*Correspondence to:* Kihong Park ([kpark@gist.ac.kr](mailto:kpark@gist.ac.kr)) and Young Jun Yoon ([yjyoon@kopri.re.kr](mailto:yjyoon@kopri.re.kr))

The copyright of individual parts of the supplement might differ from the CC BY 4.0 License.

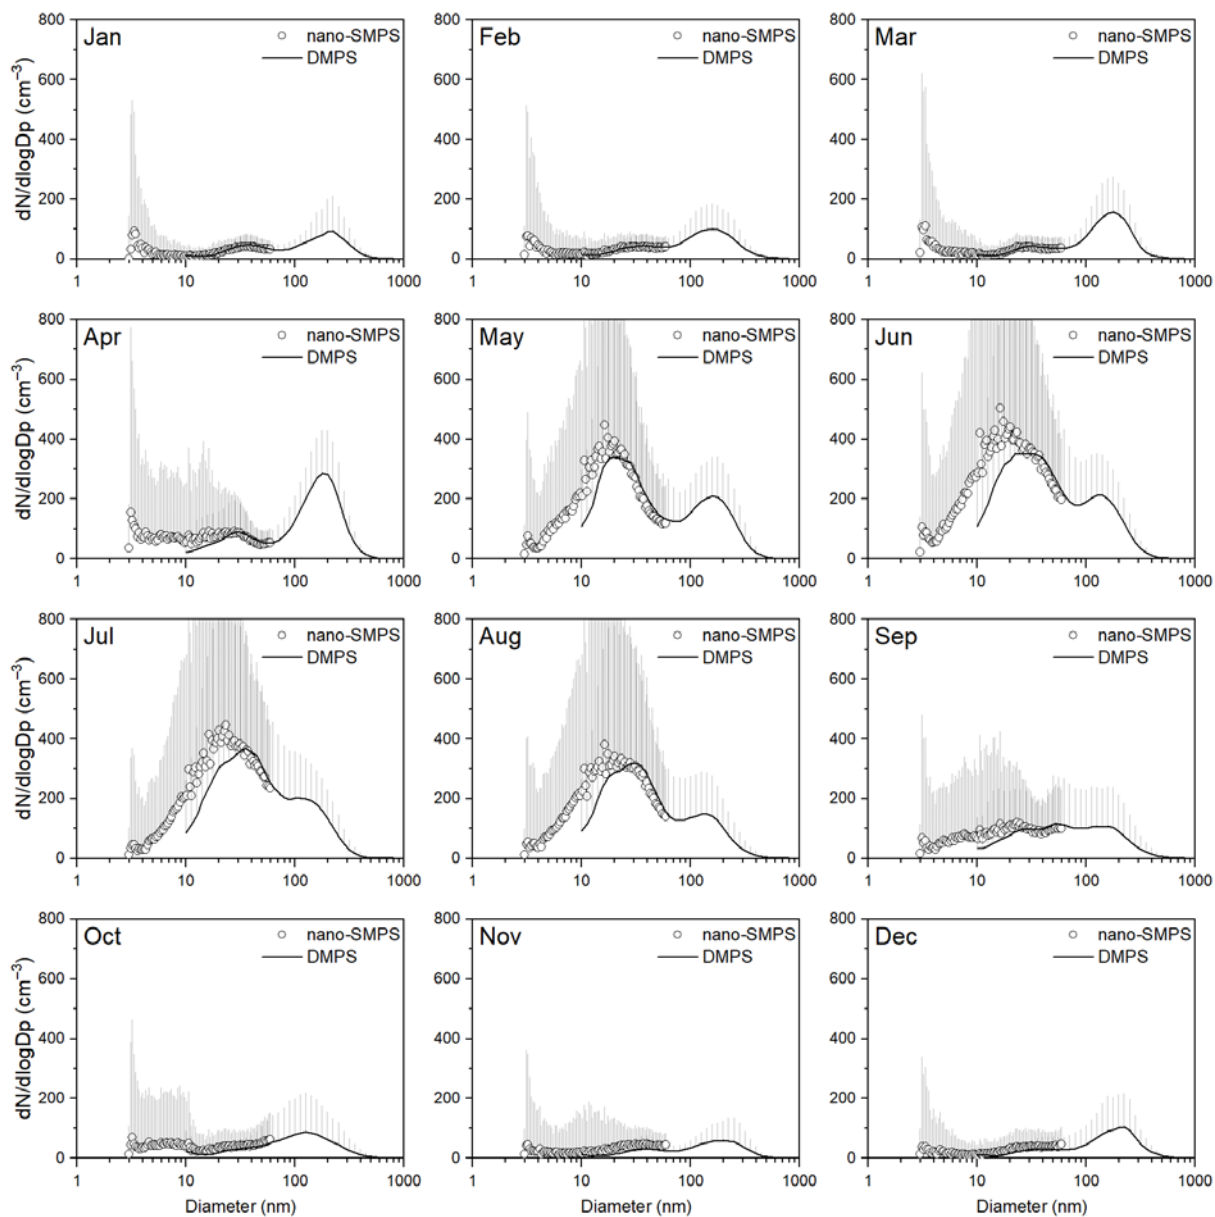

Figure S1. Comparison of monthly average size distributions obtained from the nano-SMPS (3–60 nm) and DMPS (10–810 nm) during the measurement period. The error bar indicates standard deviation.

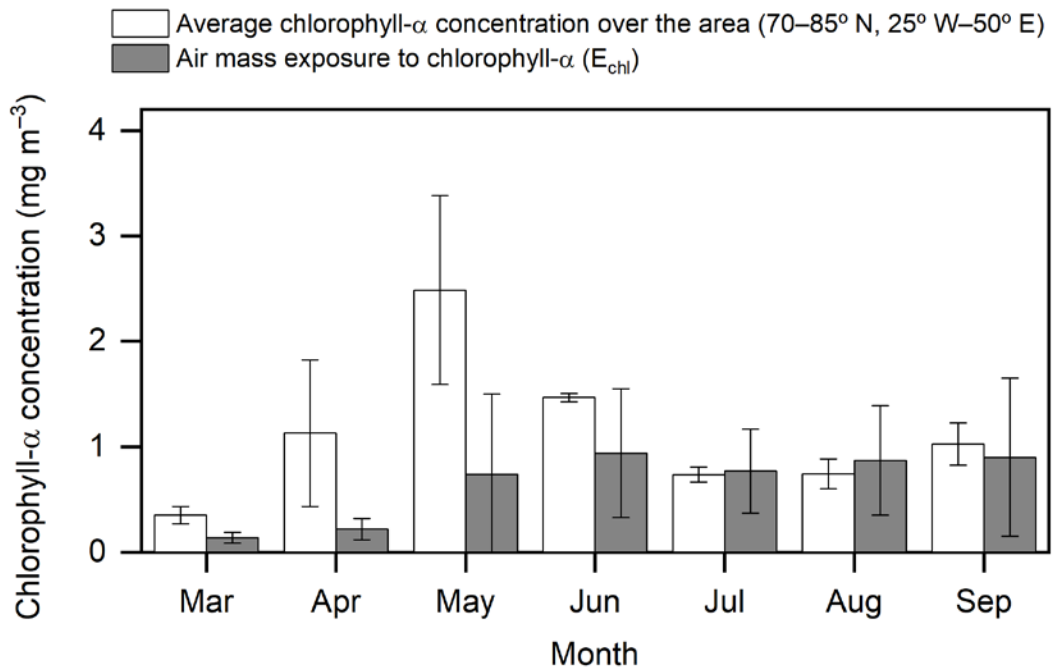

Figure S2. Monthly values of average chlorophyll- $\alpha$  concentration over the area (70–85° N, 25° W–50° E) and “air mass exposure to chlorophyll- $\alpha$ ” ( $E_{chl}$ ) calculated by Eq. (1) in Park et al. (2018) from March to September during the measurement period.

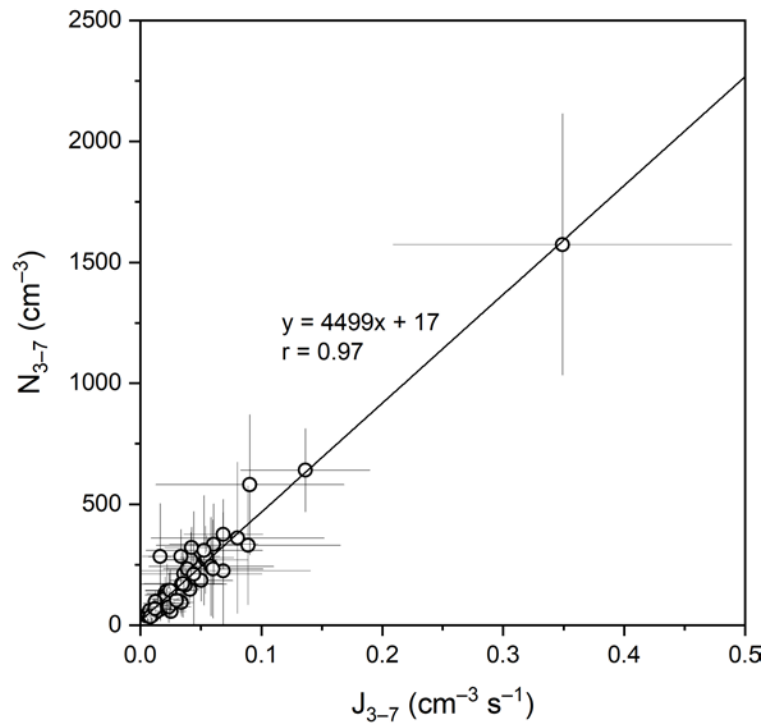

Figure S3. Relationship between  $N_{3-7}$  and  $J_{3-7}$  during NPF events with a linear regression line and a correlation coefficient ( $r$ ).

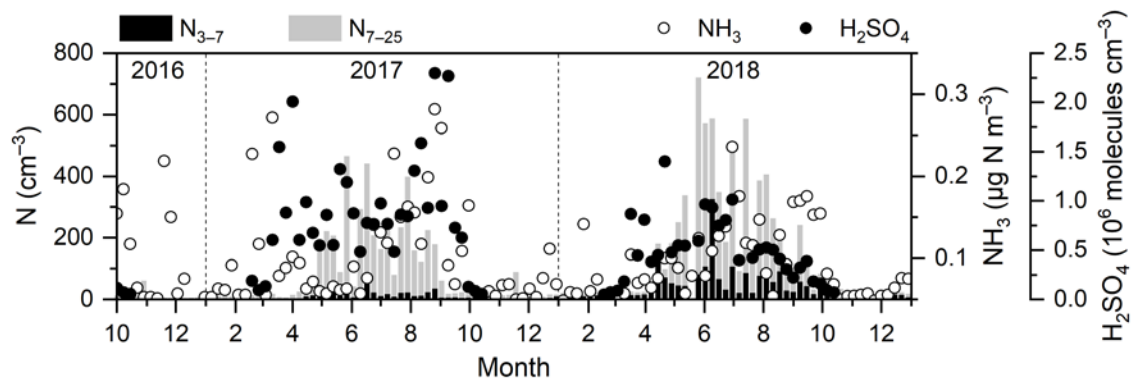

(a)

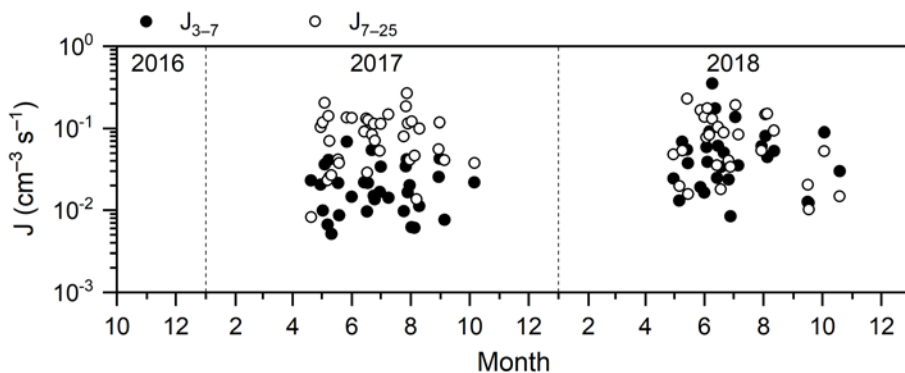

(b)

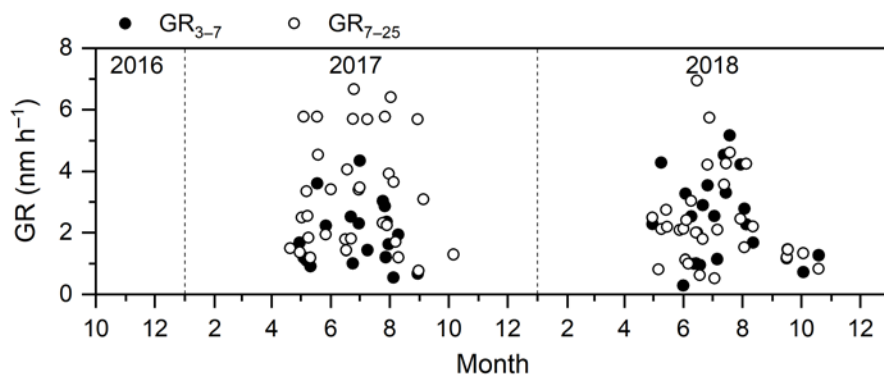

(c)

Figure S4. Time series of (a) weekly  $N_{3-7}$ ,  $N_{7-25}$ ,  $NH_3$ , and  $H_2SO_4$ , (b) daily GR and (c) daily J in different modes ( $J_{3-7}$ ,  $J_{7-25}$ ,  $GR_{3-7}$ , and  $GR_{7-25}$ ) during the measurement period.

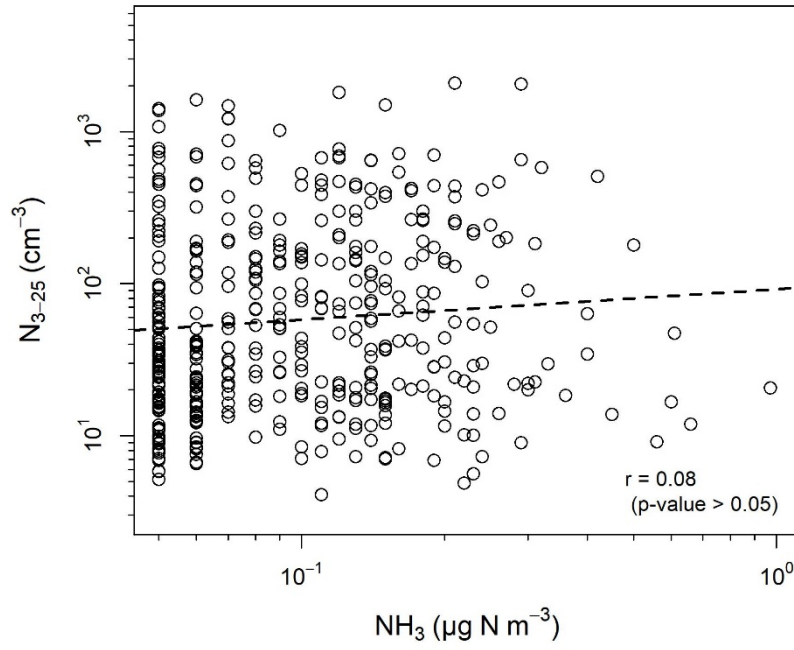

(a)

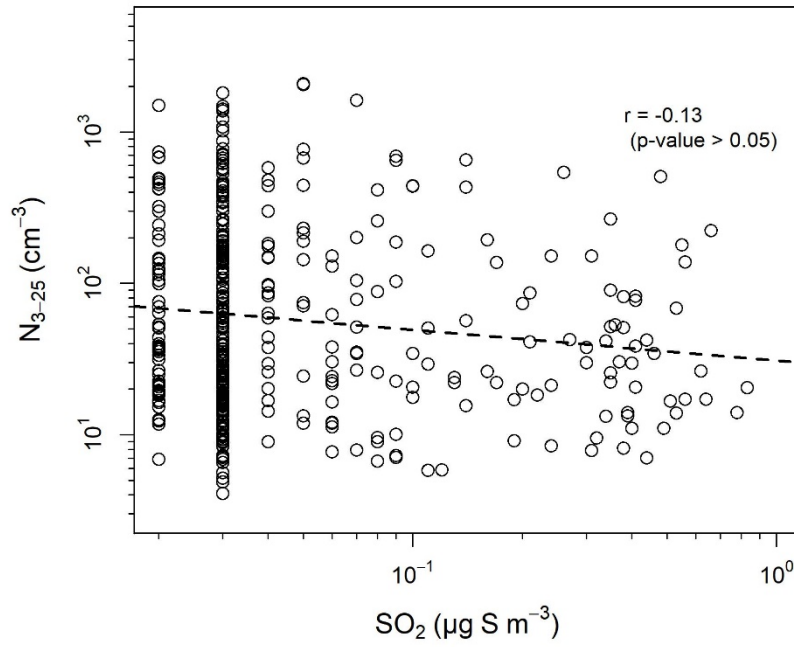

(b)

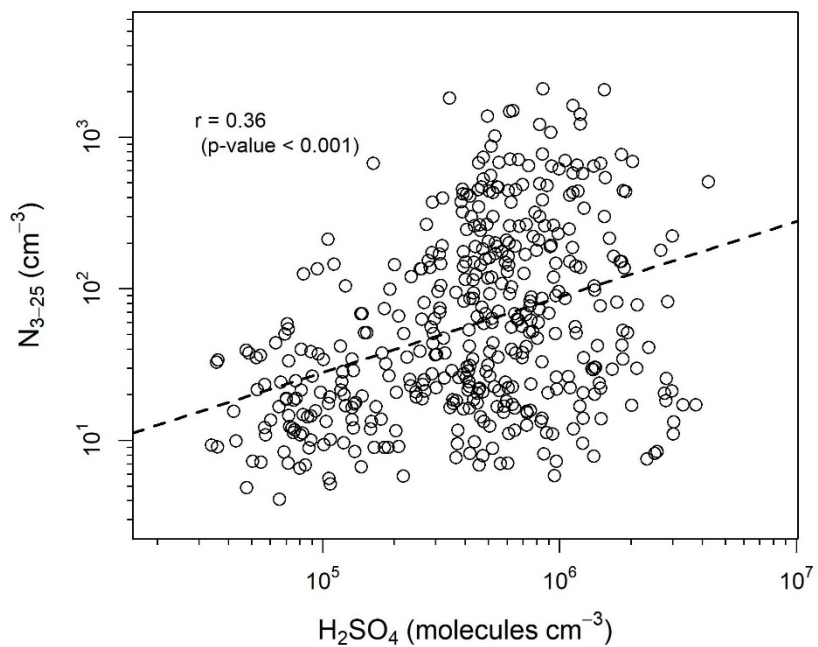

(c)

Figure S5. Correlations of daily  $N_{3-25}$  versus (a) daily  $NH_3$ , (b) daily  $SO_2$ , and (c) daily  $H_2SO_4$  concentrations during the measurement period. The dashed line represents a linear regression line with a correlation coefficient ( $r$ ).

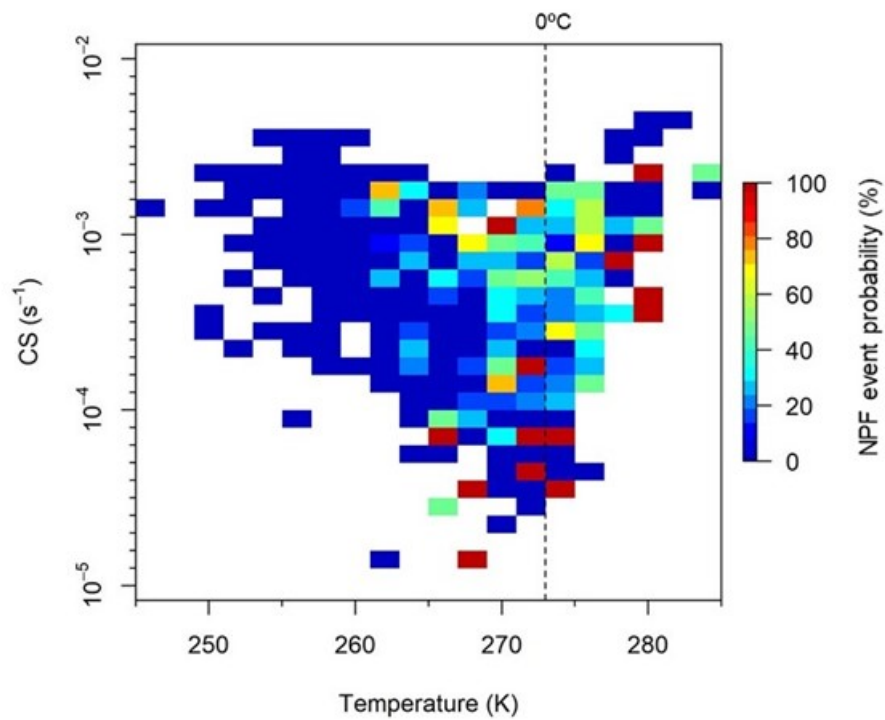

Figure S6. NPF event probability distribution with daily CS and temperature. The cell size was 2 K (temperature) and the ratio of 1.26 between two consecutive CS values.



Table S1. Average concentrations of ionic species ( $\text{Na}^+$ ,  $\text{Mg}^{2+}$ ,  $\text{K}^+$ ,  $\text{NH}_4^+$ ,  $\text{NO}_3^-$ ,  $\text{SO}_4^{2-}$ , and  $\text{Cl}^-$ ) in particulate matter and gaseous species ( $\text{NH}_3$ ,  $\text{SO}_2$ , and  $\text{H}_2\text{SO}_4$ ) in different seasons during the measurement period.

|                         | Unit                             | Spring          | Summer          | Fall            | Winter          |
|-------------------------|----------------------------------|-----------------|-----------------|-----------------|-----------------|
| $\text{Na}^+$           | $\mu\text{g m}^{-3}$             | $0.27 \pm 0.38$ | $0.18 \pm 0.28$ | $0.22 \pm 0.28$ | $0.31 \pm 0.33$ |
| $\text{Mg}^{2+}$        | $\mu\text{g m}^{-3}$             | $0.04 \pm 0.08$ | $0.02 \pm 0.04$ | $0.03 \pm 0.04$ | $0.05 \pm 0.05$ |
| $\text{K}^+$            | $\mu\text{g m}^{-3}$             | $0.05 \pm 0.07$ | $0.03 \pm 0.02$ | $0.03 \pm 0.02$ | $0.03 \pm 0.02$ |
| $\text{NH}_4^+$         | $\mu\text{g N m}^{-3}$           | $0.04 \pm 0.05$ | $0.02 \pm 0.03$ | $0.02 \pm 0.03$ | $0.02 \pm 0.02$ |
| $\text{NO}_3^-$         | $\mu\text{g N m}^{-3}$           | $0.02 \pm 0.02$ | $0.02 \pm 0.02$ | $0.02 \pm 0.04$ | $0.02 \pm 0.02$ |
| $\text{SO}_4^{2-}$      | $\mu\text{g S m}^{-3}$           | $0.19 \pm 0.18$ | $0.08 \pm 0.10$ | $0.08 \pm 0.09$ | $0.11 \pm 0.20$ |
| $\text{Cl}^-$           | $\mu\text{g m}^{-3}$             | $0.39 \pm 0.63$ | $0.24 \pm 0.43$ | $0.35 \pm 0.50$ | $0.52 \pm 0.59$ |
| $\text{NH}_3$           | $\mu\text{g N m}^{-3}$           | $0.13 \pm 0.60$ | $0.16 \pm 0.22$ | $0.10 \pm 0.10$ | $0.08 \pm 0.07$ |
| $\text{SO}_2$           | $\mu\text{g S m}^{-3}$           | $0.09 \pm 0.22$ | $0.08 \pm 0.11$ | $0.08 \pm 0.13$ | $0.09 \pm 0.27$ |
| $\text{H}_2\text{SO}_4$ | $10^5 \text{ molecules cm}^{-3}$ | $7.43 \pm 8.16$ | $8.59 \pm 8.64$ | $5.52 \pm 8.91$ | $0.95 \pm 0.69$ |
